# Supplementary material
Source: PubMed Central journal article supplement (PMC3716092)

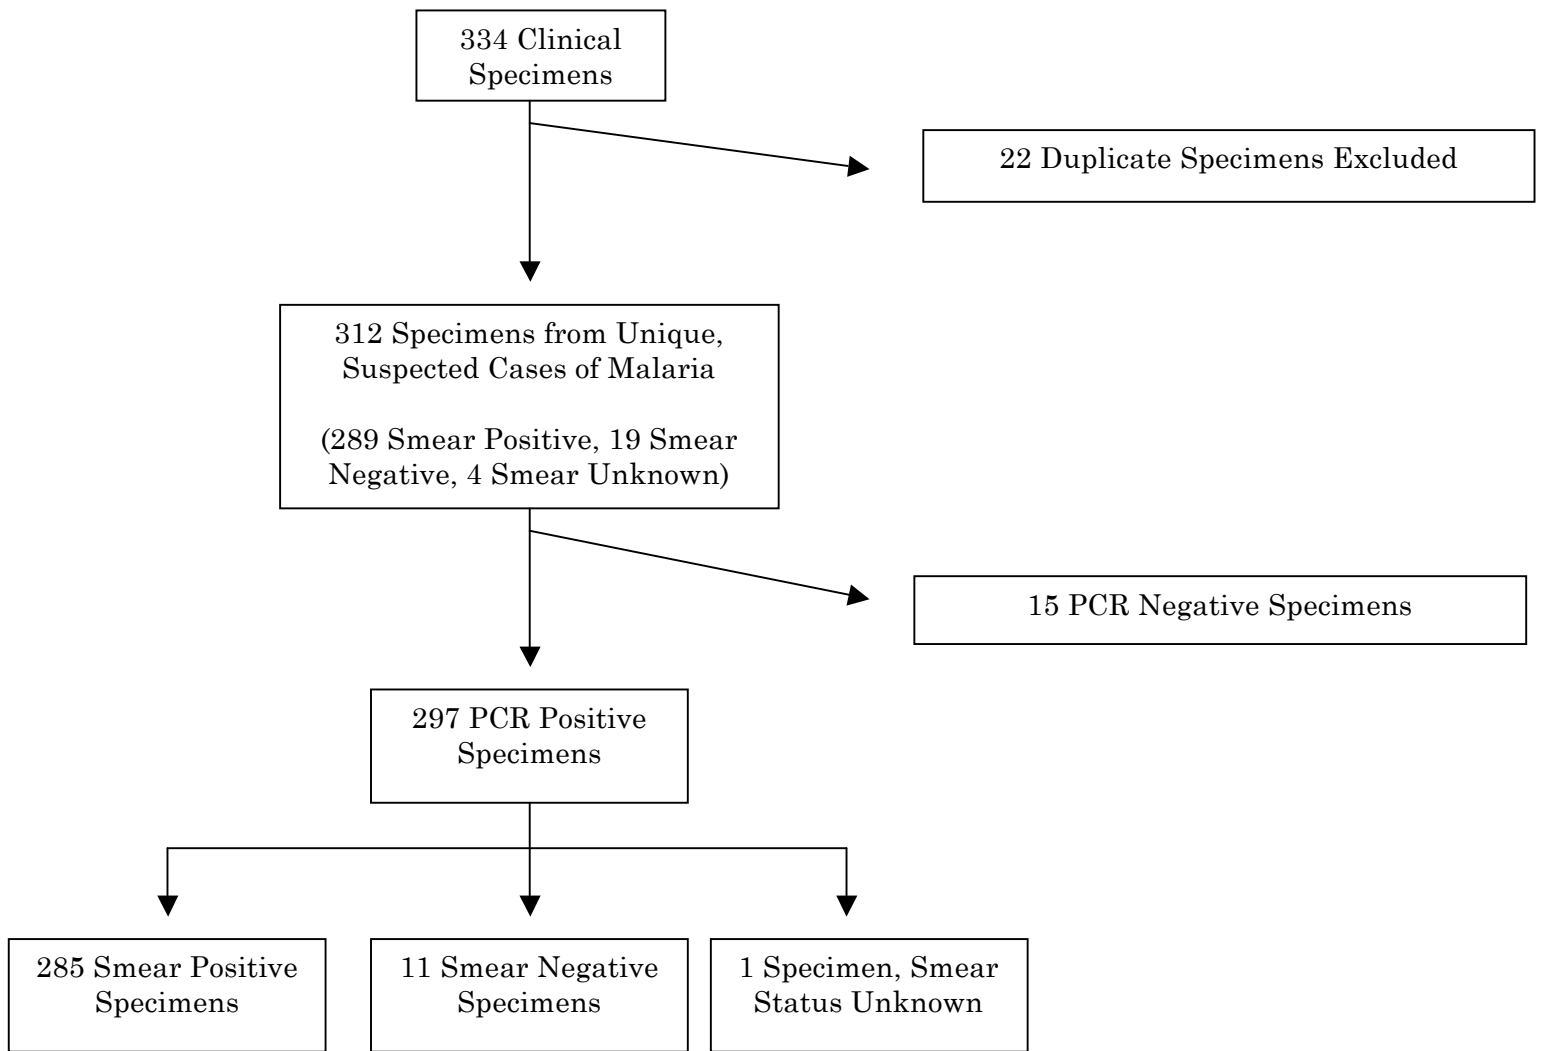

SUPPL. FIG 1. Flowchart describing the samples included in the statistical analyses.

Supplement: JCM.00195-13_zjm999092566so1.pdf [file JCM.00195-13_zjm999092566so1.pdf]
